# Supplementary material for: Generative Adversarial Networks–Enabled Human–Artificial Intelligence Collaborative Applications for Creative and Design Industries: A Systematic Review of Current Approaches and Trends
Source: Frontiers journal article supplement (doi:10.3389/frai.2021.604234), 2021-04-28
Supplement: Data_Sheet_1.PDF [file Data_Sheet_1.PDF]

| Author               | Year | Title                                                                                                                                 | UX Modality      | Operation      | Domain       | Type       |
|----------------------|------|---------------------------------------------------------------------------------------------------------------------------------------|------------------|----------------|--------------|------------|
| Zhu et al.           | 2016 | Generative Visual Manipulation on the Natural Image Manifold                                                                          | Sketch           | Beautification | Art          | Conference |
| Liu et al.           | 2017 | Interactive 3D Modeling with a Generative Adversarial Network                                                                         | Landmark         | Beautification | Art          | Conference |
| Zhang et al.         | 2017 | Real-Time User-Guided Image Colorization with Learned Deep Priors                                                                     | Landmark         | Beautification | Art          | Journal    |
| Guerin et al.        | 2017 | Interactive Example-Based Terrain Authoring with Conditional Generative Adversarial Networks                                          | Sketch           | Beautification | Art          | Journal    |
| Kelly et al.         | 2018 | FrankenGAN: Guided Detail Synthesis for Building Mass Models Using Style-Synchronized GANs                                            | Sketch; Landmark | Beautification | Architecture | Journal    |
| Chen et al.          | 2018 | Doodle Master: A Doodle Beautification System Based on Auto-Encoding Generative Adversarial Networks                                  | Sketch           | Beautification | Art          | Conference |
| Wu et al.            | 2018 | Brush Stroke Synthesis with a Generative Adversarial Network Driven by Physically Based Simulation                                    | Sketch           | Beautification | Art          | Conference |
| Ci et al.            | 2018 | User-Guided Deep Anime Line Art Colorization with Conditional Adversarial Networks                                                    | Sketch           | Beautification | Art          | Conference |
| Simo-Serra et al.    | 2018 | Mastering Sketching: Adversarial Augmentation for Structured Prediction                                                               | Sketch           | Beautification | Art          | Journal    |
| Su et al.            | 2018 | Interactive Sketch-Based Normal Map Generation with Deep Neural Networks                                                              | Sketch           | Beautification | Art          | Journal    |
| Zhao and Ma          | 2018 | A Compensation Method of Two-Stage Image Generation for Human-AI Collaborated In-Situ Fashion Design in Augmented Reality Environment | Sketch; Landmark | Beautification | Fashion      | Conference |
| Cui et al.           | 2018 | FashionGAN: Display your fashion design using Conditional Generative Adversarial Nets                                                 | Sketch; Landmark | Beautification | Fashion      | Journal    |
| Volz et al.          | 2018 | Evolving Mario Levels in the Latent Space of a Deep Convolutional Generative Adversarial Network                                      | Parameter        | Variation      | Gaming       | Conference |
| Hati et al.          | 2019 | PaintsTorch: A User-Guided Anime Line Art Colorization Tool with Double Generator Conditional Adversarial Network                     | Landmark         | Beautification | Art          | Conference |
| Jo and Park          | 2019 | SC-FEGAN: Face Editing Generative Adversarial Network With Users Sketch and Color                                                     | Sketch           | Beautification | Art          | Conference |
| Park et al.          | 2019 | Semantic Image Synthesis With Spatially-Adaptive Normalization                                                                        | Sketch           | Beautification | Art          | Conference |
| Zou et al.           | 2019 | Language-Based Colorization of Scene Sketches                                                                                         | Language         | Beautification | Art          | Journal    |
| Sun et al.           | 2019 | SmartPaint: a co-creative drawing system based on generative adversarial networks                                                     | Sketch           | Beautification | Art          | Journal    |
| Zhao et al.          | 2019 | Multi-Theme Generative Adversarial Terrain Amplification                                                                              | Sketch           | Beautification | Art          | Journal    |
| Zheng et al.         | 2019 | Content-Aware Generative Modeling of Graphic Design Layouts                                                                           | Sketch           | Beautification | Design       | Journal    |
| Hsieh et al.         | 2019 | BasketballGAN: Generating Basketball Play Simulation Through Sketching                                                                | Sketch; Landmark | Prediction     | Sport        | Conference |
| Chen et al.          | 2019 | An artificial intelligence based data-driven approach for design ideation                                                             | Landmark         | Variation      | Design       | Conference |
| Sun et al.           | 2019 | Adversarial Colorization of Icons Based on Contour and Color Conditions                                                               | Sketch; Landmark | Variation      | Design       | Conference |
| Zeng et al.          | 2019 | Artificial Intelligence Augments Design Creativity: A Typeface Family Design Experiment                                               | Landmark         | Variation      | Design       | Journal    |
| Sbai et al.          | 2019 | DesIGN: Design Inspiration from Generative Networks                                                                                   | Landmark         | Variation      | Fashion      | Conference |
| Kato et al.          | 2019 | GANs-Based Clothes Design: Pattern Maker Is All You Need to Design Clothing                                                           | Sketch           | Variation      | Fashion      | Conference |
| Noyman and Larson    | 2020 | DeepScope: HCI Platform for Generative Cityscape Visualization                                                                        | Landmark         | Beautification | Architecture | Conference |
| Nauata et al.        | 2020 | House-GAN: Relational Generative Adversarial Networks for Graph-constrained House Layout Generation                                   | NodeBased        | Beautification | Architecture | Journal    |
| Ho et al.            | 2020 | Sketch-guided Deep Portrait Generation                                                                                                | Sketch           | Beautification | Art          | Journal    |
| Ren et al.           | 2020 | Two-Stage Sketch Colorization With Color Parsing                                                                                      | Sketch; Landmark | Beautification | Art          | Journal    |
| Ho et al.            | 2020 | Sequential Attention GAN for Interactive Image Editing                                                                                | Language         | Beautification | Fashion      | Conference |
| Dong et al.          | 2020 | Fashion Editing With Adversarial Parsing Learning                                                                                     | Sketch           | Beautification | Fashion      | Conference |
| Gutierrez and Schrum | 2020 | Generative Adversarial Network Rooms in Generative Graph Grammar Dungeons for The Legend of Zelda                                     | NodeBased        | Beautification | Gaming       | Journal    |
| Schrum et al.        | 2020 | Interactive Evolution and Exploration within Latent Level-Design Space of Generative Adversarial Networks                             | Parameter        | Variation      | Gaming       | Conference |
